# Supplementary material for: RBI: a novel algorithm for regulatory-metabolic network model in designing the optimal mutant strain
Source: PeerJ journal article supplement (doi:10.7717/peerj-cs.2880), 2025-05-27
Supplement: FigS1.pdf [file FigS1.pdf]

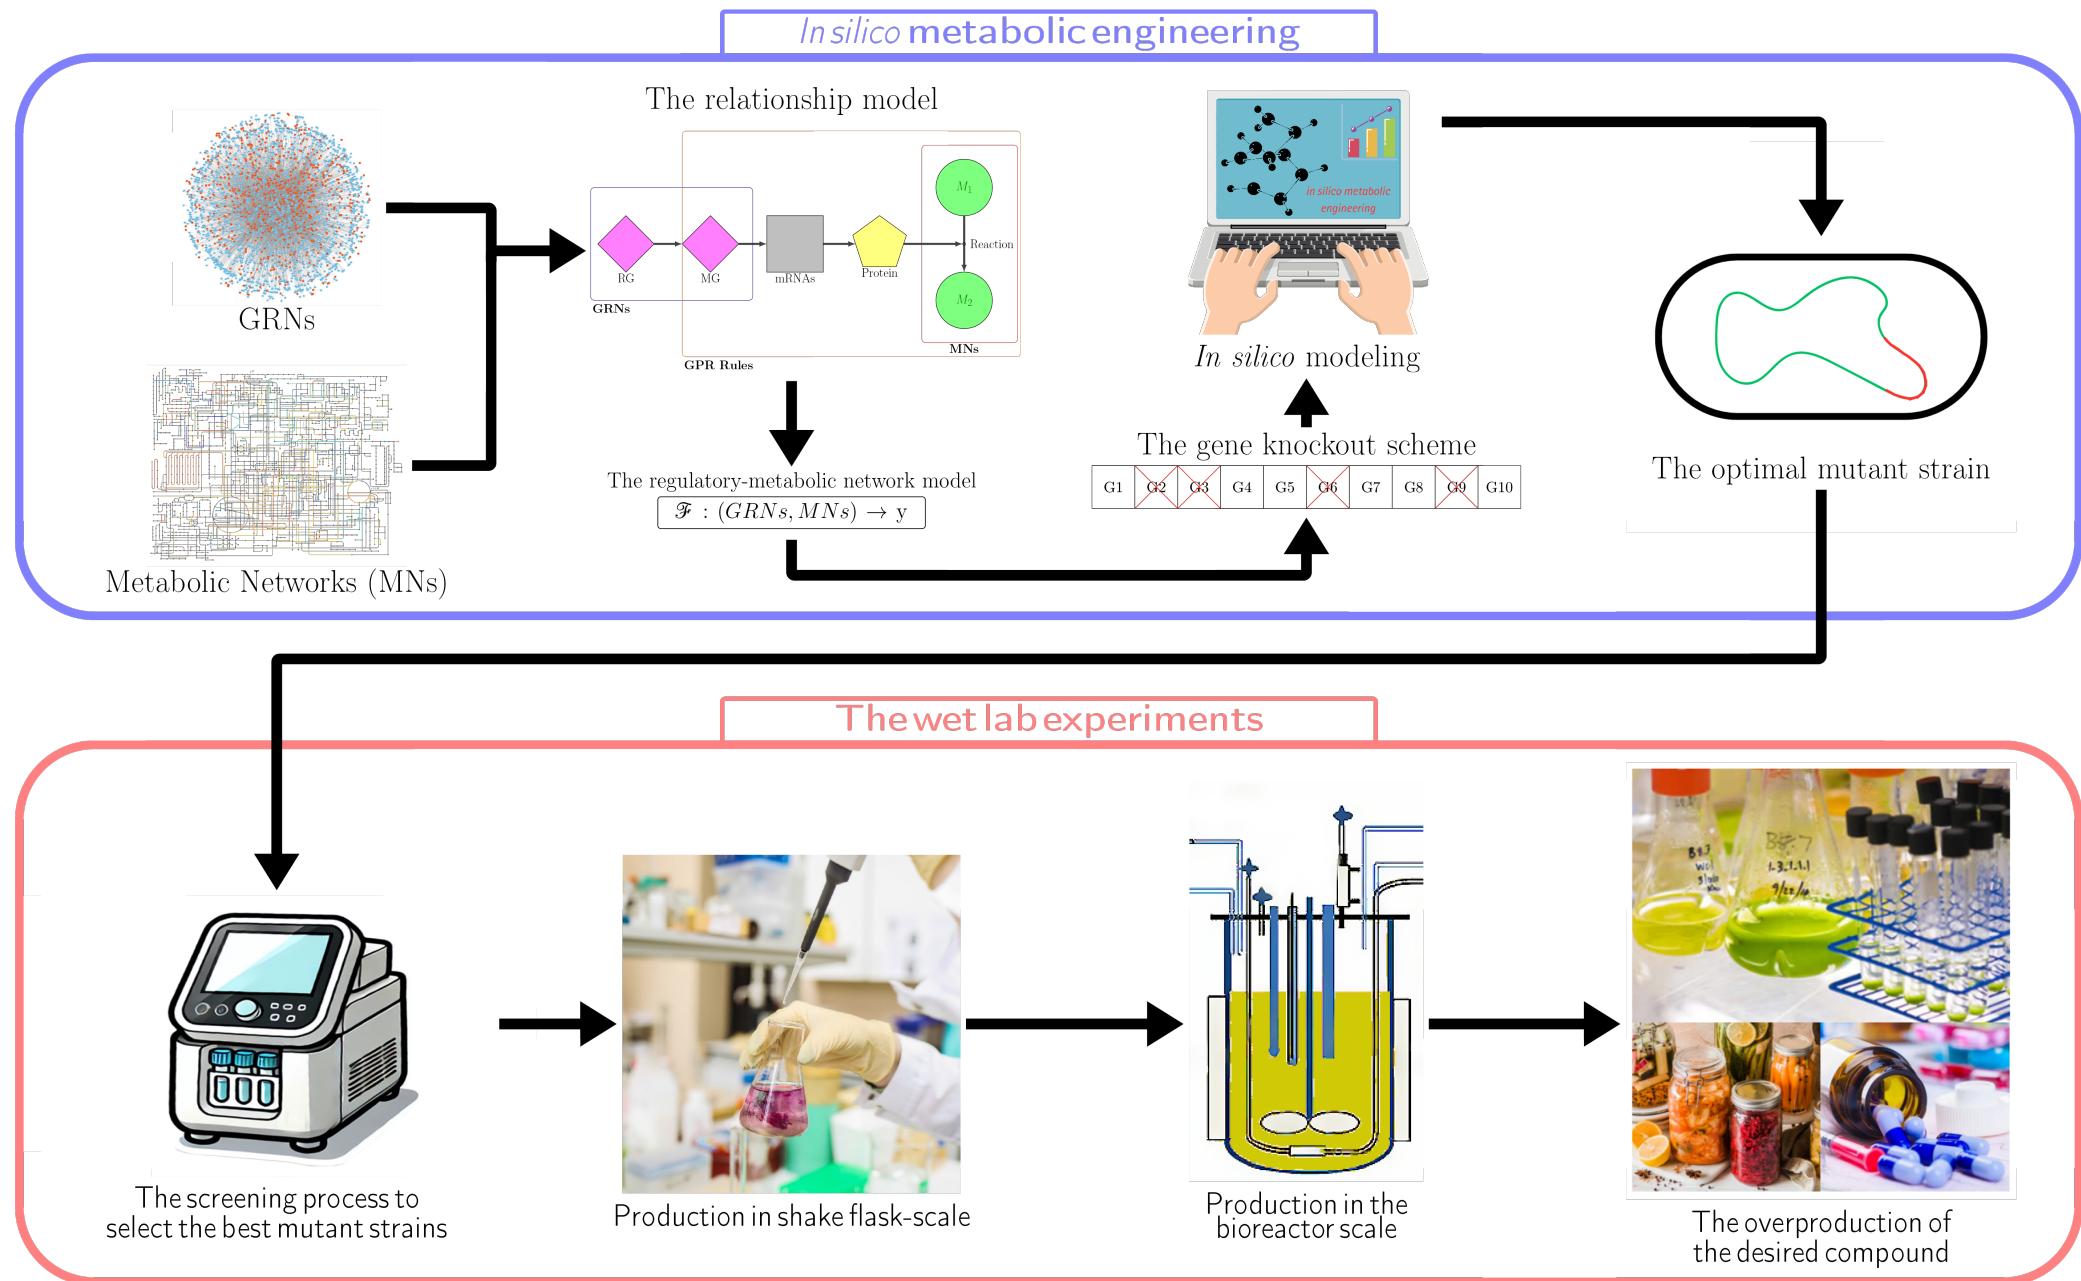

A general procedure *in silico* metabolic engineering for predicting the optimal mutant strain and guiding the wet lab experiments.
