# Supplementary material for: RBI: a novel algorithm for regulatory-metabolic network model in designing the optimal mutant strain
Source: PeerJ journal article supplement (doi:10.7717/peerj-cs.2880), 2025-05-27
Supplement: FigS2.pdf [file FigS2.pdf]

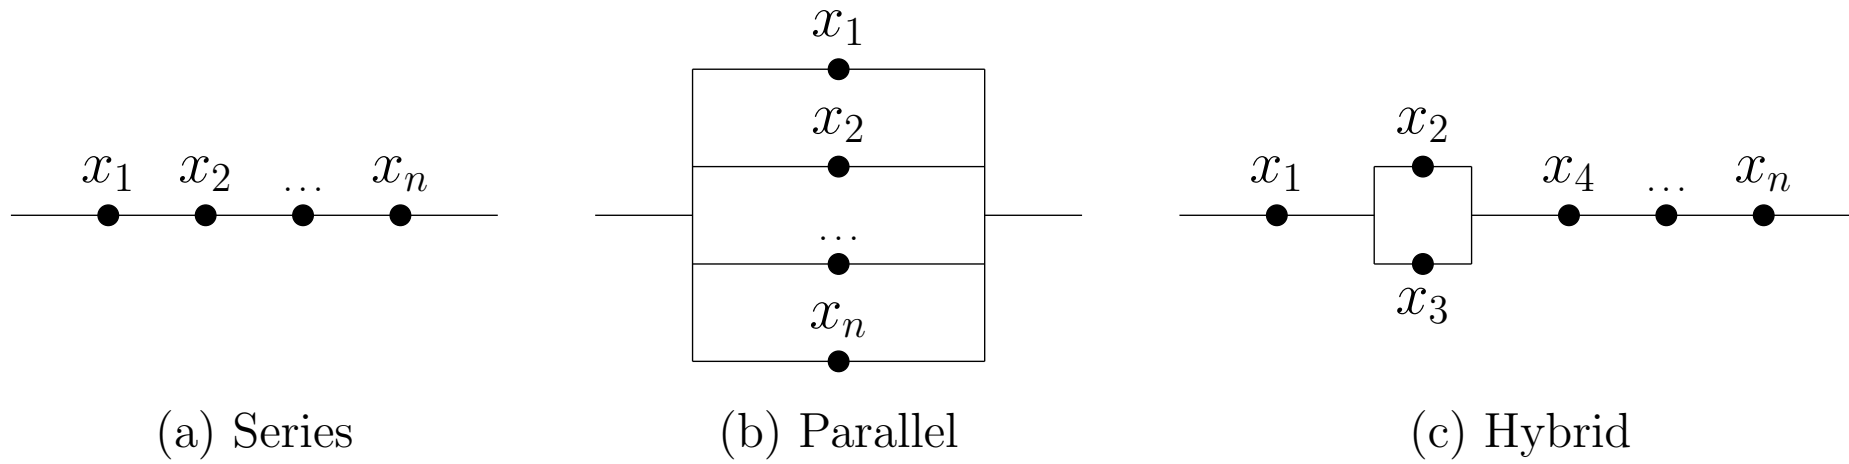

Illustration of series, parallel, and hybrid structures in reliability theory.
