# Supplementary material for: RBI: a novel algorithm for regulatory-metabolic network model in designing the optimal mutant strain
Source: PeerJ journal article supplement (doi:10.7717/peerj-cs.2880), 2025-05-27
Supplement: FigS3.pdf [file FigS3.pdf]

$$aspA = (Crp \text{ AND } (\text{NOT } Fnr)) \text{ OR } Fnr$$

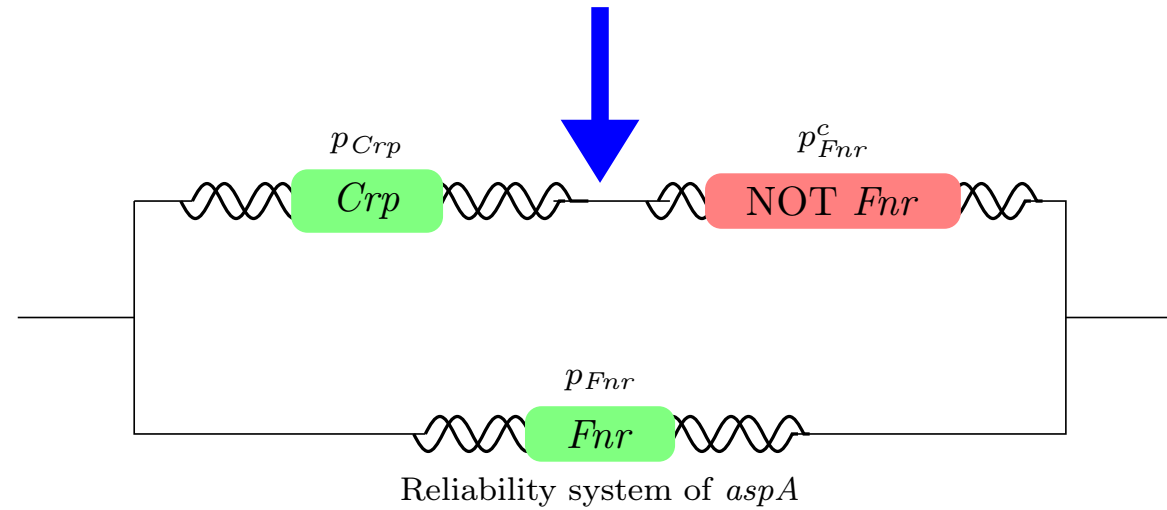

$$r_{aspA} = 1 - (1 - p_{Crp} p_{Fnr}^c)(1 - p_{Fnr})$$

Illustration of the determining process of the 'aspA' reliability from the empirical GRNs.
