# Supplementary material for: RBI: a novel algorithm for regulatory-metabolic network model in designing the optimal mutant strain
Source: PeerJ journal article supplement (doi:10.7717/peerj-cs.2880), 2025-05-27
Supplement: FigS4.pdf [file FigS4.pdf]

$$ATPS_{4r} = (AtpF0 \text{ AND } AtpF1) \text{ OR } (AtpF0 \text{ AND } AtpF1 \text{ AND } AtpI)$$

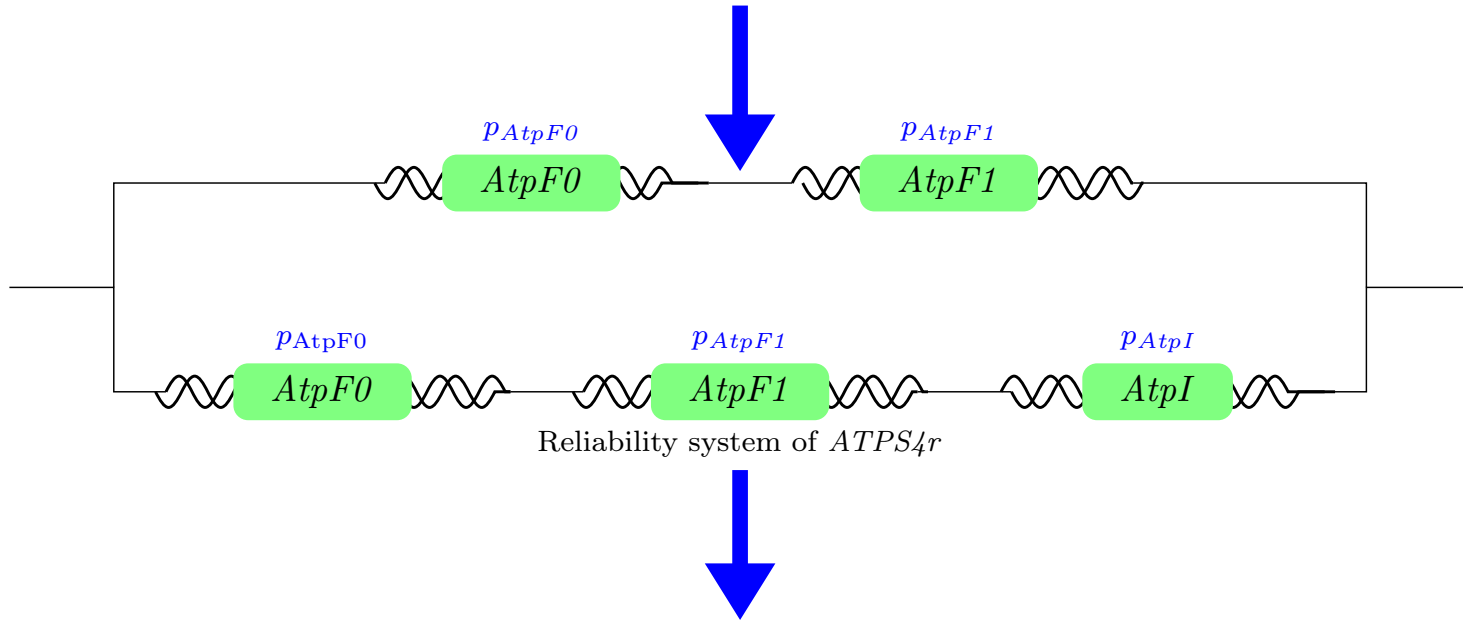

$$r_{ATPS_{4r}} = 1 - (1 - p_{AtpF0} p_{AtpF1})(1 - p_{AtpF0} p_{AtpF1} p_{AtpI})$$

Illustration of the determining process of the 'ATPS4r' reliability from the GPR rules.
