# Supplementary material for: RBI: a novel algorithm for regulatory-metabolic network model in designing the optimal mutant strain
Source: PeerJ journal article supplement (doi:10.7717/peerj-cs.2880), 2025-05-27
Supplement: FigS6.pdf [file FigS6.pdf]

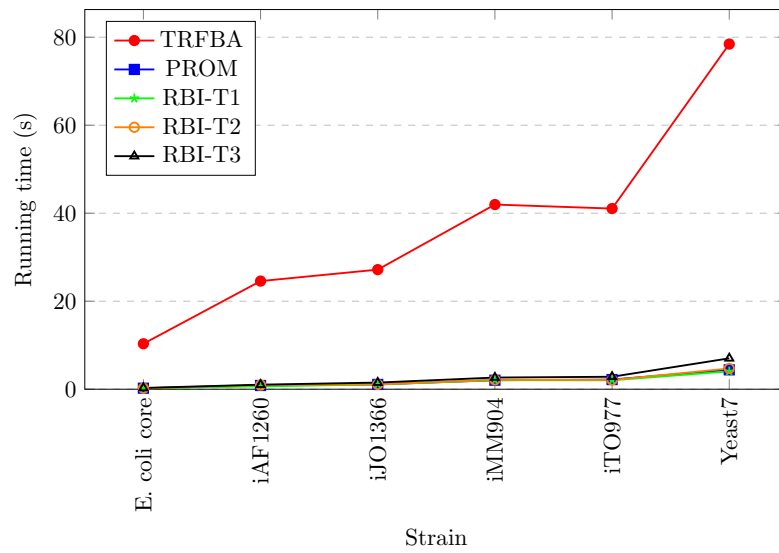

Graph depicting the running times of the RBI-T1, RBI-T2, RBI-T3, PROM, and TRFBA algorithms on a specific strain model.
