# Supplementary material for: RBI: a novel algorithm for regulatory-metabolic network model in designing the optimal mutant strain
Source: PeerJ journal article supplement (doi:10.7717/peerj-cs.2880), 2025-05-27
Supplement: TableS1.pdf [file TableS1.pdf]

The initial probability values of the regulatory gene for each type of RBI

| No | Type of RBI | The initial probability values of the $i$ th gene                                      |
|----|-------------|----------------------------------------------------------------------------------------|
| 1  | RBI-T1      | $p_{TF_i} = f(TF_i) = 0.5$                                                             |
| 2  | RBI-T2      | $p_{TF_i} = f(TF_i) = \frac{1}{d} \times n(RG_i = 1)$                                  |
| 3  | RBI-T3      | $p_{TF_i} = f(TF_i) = \frac{1}{2} \left( 0.5 + \frac{1}{d} \times n(TF_i = 1) \right)$ |

Note: Additional information regarding those formulas was included in the RBI steps.
